# Supplementary material
Source: PubMed Central journal article supplement (PMC1895803)

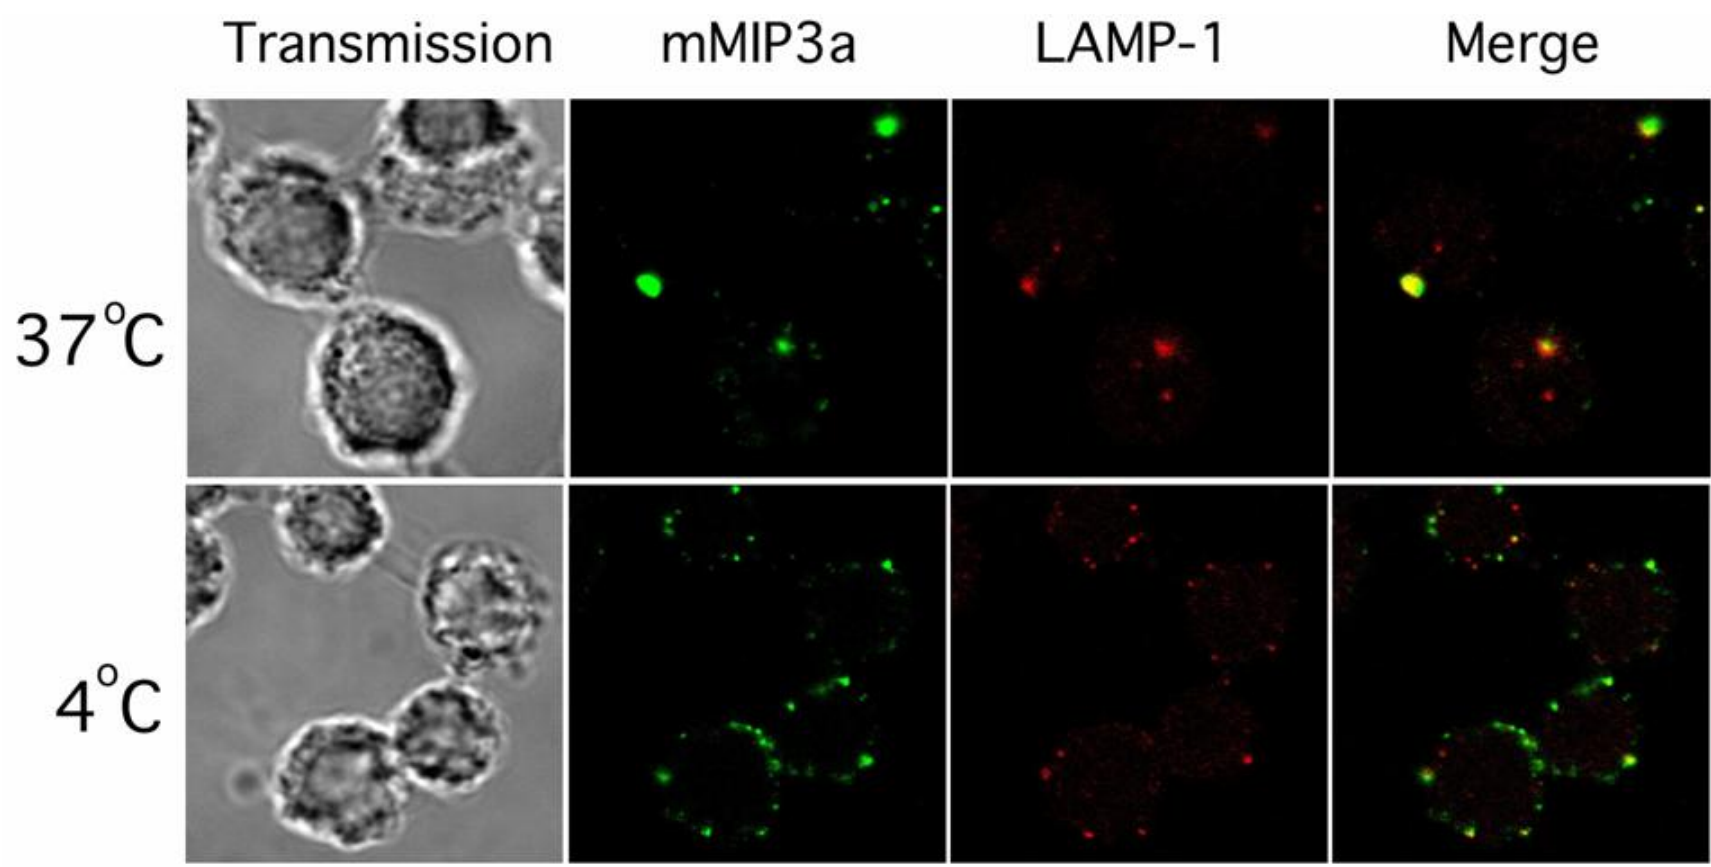

Supplement: blood_2005-08-3207_1.pdf [file blood_2005-08-3207_1.pdf]

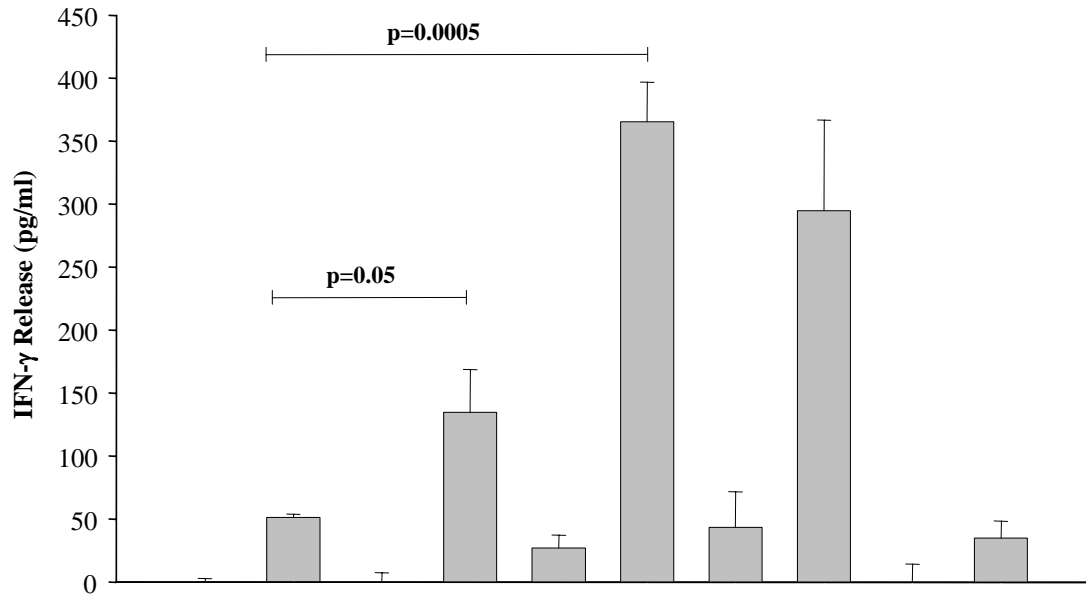

|                         |                         |   |   |   |   |   |   |   |   |   |   |
|-------------------------|-------------------------|---|---|---|---|---|---|---|---|---|---|
| Target                  |                         | + | + | + | + | + | + | + | + | + | + |
| Effector                | pMIP3 $\alpha$ -D-gp100 | + | + | - | - | - | - | - | - | - | - |
|                         | pMIP3 $\alpha$ -gp100   | - | - | + | + | - | - | - | - | - | - |
|                         | pmDF2 $\beta$ -gp100    | - | - | - | - | + | + | - | - | - | - |
|                         | hgp100 <sub>25-33</sub> | - | - | - | - | - | - | + | + | - | - |
|                         | PBS                     | - | - | - | - | - | - | - | - | - | + |
| mgp100 <sub>25-33</sub> |                         | - | + | - | + | - | + | - | + | - | + |
| A20 peptide             |                         | + | - | + | - | + | - | + | - | + | - |

Supplement: blood_2005-08-3207_3.pdf [file blood_2005-08-3207_3.pdf]
